## 17 **Abstract**

18 Understanding the incidence and trends of cruciate ligament (CL) surgeries in Japan is crucial for  
19 providing effective healthcare services. This study aimed to use open data available from the  
20 National Database of Health Insurance Claims and Specific Health Checkups of Japan (NDB) to  
21 determine the changes over time in CL surgeries and to analyze the characteristics of the Japanese  
22 population in terms of sex and age. We retrospectively identified CL surgeries of the knee joint  
23 registered from April 2014 to March 2020 using the NDB open data. Data on sex, age, and practice  
24 were extracted to determine the number of cases per 100,000 population. Trends in the annual  
25 incidence of CL surgeries were evaluated using Poisson regression analysis. In total, 112,686 CL  
26 surgeries were performed from 2014 to 2019. Arthroscopic ligament reconstruction accounted for  
27 98% of all the cases. The number of surgeries performed had increased significantly from 16,975 in  
28 2014 to 19,735 in 2019 ( $P < 0.001$ ). Overall, CL surgeries were most common in the 15–19 years age  
29 group, followed by the 20–29 years age group. However, these trends differed between males and  
30 females. The incidence of CL surgery in Japan has increased, and its characteristics vary by gender  
31 and age. These characteristics have been identified not only in younger patients but also in middle-  
32 aged and older patients. It would be valuable to further investigate the general patterns of CL surgery  
33 in Japan.

34

## 35 **Introduction**

36 In recent years, the availability of medical and national big data has made it possible to determine the  
37 incidence of ligament injuries and surgeries [1–9]. These studies have revealed epidemiological  
38 models that allow for the generalization of disease incidence. They have also been used to improve  
39 treatment strategies and health care services to enhance patients' quality of life.

40 In Japan, an epidemiological study using insurance records of middle and high school athletes  
41 reported 30,458 anterior cruciate ligament (ACL) injuries (0.81 per 1000 athlete-years) in these  
42 growing athletes over a 10-years from 2005 to 2014. Furthermore, the incidence rate of ACL injuries  
43 was reported to be 2.8 times higher in female athletes than in male athletes [10]. This previous study  
44 determined the incidence of ACL injuries using a large and long-term insurance dataset; however, it  
45 only focused on populations considered at high risk for ACL injury, and the incidence and the post-  
46 injury response of other populations remain unknown.

47 To understand the incidence and trends of the disease in the Japanese population, a larger sample  
48 size should be examined. Epidemiological studies using the National Database of Health Insurance  
49 Claims and Specific Health Checkups of Japan (NDB) established by the Ministry of Health, Labour  
50 and Welfare (MHLW) and NDB open data, which is a more generalized compilation of the NDB, have  
51 been actively conducted in the field of locomotor system [11–13]. Epidemiological modeling from  
52 these big data could lead to improved healthcare services.

53 This study aimed to elucidate trends in the number of cruciate ligament (CL) surgeries, sex, age  
54 distribution, and characteristics over time using NDB open data from 2014 to 2019. We hypothesized  
55 that the number of CL surgeries would increase over the years, and that there would be a higher  
56 incidence of such surgeries among females.

57

58

## 59 **Materials and methods**

60 This population-based retrospective cohort study uses the NDB open data provided by the MHLW  
61 from April 2014 to March 2020. These data are widely accessed for research purposes and have been  
62 anonymized. Therefore, obtaining informed consent was not necessary.

63 We accessed the NDB open data website and obtained data on the "Number of calculations by sex,  
64 and age group" for "operation (Code K)" [14–19]. There were four categories of the CL of the knee  
65 joint: ligament tear suture (K074), arthroscopic ligament tear suture (K074-2), ligament reconstruction  
66 (K079), and arthroscopic ligament reconstruction (K079-2). Data on the number of registered CL  
67 surgeries were stratified by fiscal year, sex, and age (5-year interval). No detailed analyses were  
68 performed if the number of registered CL surgeries had no specific values shown in <10 cases. The  
69 sex and age data were obtained by calculating the number of surgeries per 100,000 population. The  
70 calculation method utilized population estimates published by the Statistics Bureau of the Ministry of  
71 Internal Affairs and Communications, based on population data as of October 1 of each year [20].

72 Changes in the number of surgeries on the CL of the knee joint over time were assessed using Poisson  
73 regression, with the number of surgeries as the outcome variable and the year of surgery as the  
74 explanatory variable. The supporting information file contains the details of the STROBE checklist  
75 (S1 Table). The NDB open data is widely available for research purposes by the Ministry of Health,  
76 Labour, and Welfare (MHLW). The data are compiled and published based on existing anonymized

77 NDB, and since there is no corresponding table, individuals cannot be identified. Therefore, ethical  
78 approval was not required for this study.

## 79 Results

80 In total, 112,686 CL surgeries were performed from April 2014 to March 2020, with 109,925 (98%)  
81 being arthroscopic ligament reconstruction. The remaining procedures included ligament  
82 reconstruction and arthroscopic ligament tear suture, each accounting for approximately 1.0% of the  
83 total number of surgeries performed, with very few cases of ligament tear suture (Table 1). The number  
84 of arthroscopic ligament reconstruction increased significantly from 16,997 (18.3 cases/100,000  
85 population) in 2014 to 19,774 (22.1 cases/100,000 population) in 2019, surpassing the number of all  
86 other techniques ( $P < 0.001$ ) (Fig 1).

87

88 **Table 1. Annual number of cruciate ligament surgeries in the NDB open data from 2014 to 2019.**

| Category, year                       | 2014   | 2015   | 2016   | 2017   | 2018   | 2019   |
|--------------------------------------|--------|--------|--------|--------|--------|--------|
| Ligament tear suture                 | 26     | 24     | 15     | 20     | 16     | 19     |
| Arthroscopic ligament tear suture    | 225    | 204    | 228    | 267    | 213    | 227    |
| Ligament reconstruction              | 289    | 229    | 230    | 209    | 169    | 151    |
| Arthroscopic ligament reconstruction | 16,997 | 17,507 | 18,129 | 18,241 | 19,277 | 19,774 |
| Total                                | 17,537 | 17,964 | 18,602 | 18,737 | 19,675 | 20,171 |

89

90 **Fig 1. Number of registered arthroscopic ligament reconstruction procedures per 100,000**

91 **population from 2014 to 2019.**

92

93 Due to low registration numbers, data for the 0–9 and >70 years age groups were incomplete. For the

94 10–69 years age group, the highest number of registrations was observed in the 15–19 years age group

95 (108.5 cases/100,000 population), followed by the 20–24 years age group (41.8 cases/100,000

96 population). We noted that registrations declined with age (Fig 2 and S2 and S3 Tables).

97 In terms of sex, females outnumbered males by a factor of 6.7 in the 10–14 years age group and by

98 1.6 in the 15–19 years age group. In contrast, males were 1.6 times more likely than females to be

99 enrolled in the 20–24 years age group and more than twice as likely as females to be enrolled in the

100 25–29 and 30–34 years age groups. Registration numbers were similar for other age groups (Fig 3 and

101 S3 Table).

102

103 **Fig 2. Number of registered arthroscopic ligament t reconstruction procedures per 100,000**

104 **population by age group from 2014 to 2019.**

105 **Fig 3. Number of registered arthroscopic ligament reconstruction procedures per 100,000**

106 **population.**

107



## 108 **Discussion**

109 This study investigated the number of registered CL surgeries, sex differences, and age characteristics  
110 in Japan from 2014 to 2019 using the NDB open data. As hypothesized, there was a consistent increase  
111 in CL surgery over the study period. Notably, most CL surgeries were arthroscopic ligament  
112 reconstruction procedures, which constitutes a significant finding of this study. With the advancement  
113 of medical technology, arthroscopic surgery, which enables a detailed examination of the interior of a  
114 joint during surgery, has become increasingly prevalent [21–23]. This development may have led to  
115 the rise in the number of arthroscopic procedures in Japan.

116 Arthroscopic ligament reconstruction was found to vary by sex and age. Overall, the incidence was  
117 higher among males. Conversely, females often undergo surgery during their teenage years, potentially  
118 due to the disparity in growth rates between males and females. Height growth in Japanese females  
119 reaches its peak around 2 years earlier than in males [24]. Variations in growth rates may influence  
120 the timing of surgery. However, it should be noted that CL surgery has been a subject of intense debate  
121 regarding its potential impact on growth retardation [25,26]. Other factors, such as female's inability  
122 to be active in sports at times due to childbirth, may be related to the sex difference. Another finding  
123 was that the incidence of surgery among middle-aged and older adults had also increased. Injuries  
124 resulting from sports activities, everyday sprains, and falls are common among middle-aged and older  
125 adults [27]. This can be attributed to increased health awareness and higher physical activity levels.

126 Additionally, there is a higher risk of knee joint dysfunction and secondary injuries (such as meniscus  
127 and cartilage damage) [28,29]. Good outcomes of CL surgery in middle-aged and older patients have  
128 also been reported [30,31]. Consequently, many patients may choose surgery with the goal of  
129 regaining their previous level of activity. In Japan, like in other countries, the indications for surgery  
130 have likely expanded due to changes in individual lifestyles and advancements in medical technology.

131 This study had several limitations. First, it failed to provide details on the number of ACL and PCL  
132 surgeries as a categorization of the CL surgeries. Second, tissue injuries other than those caused by  
133 CL surgery were not identified, as they cannot be used for ligament and meniscus surgeries for health  
134 claims. Third, it was impossible to analyze information other than medical practice, sex, and age.

135 Finally, traffic accidents and occupational injuries were not included in the present data.

136 In future studies, we aim to investigate the number of injuries and reconstruction surgeries separately  
137 for ACL and PCL injuries. We would also like to clarify the characteristics of Japanese patients  
138 through comparison with overseas reports. We believe organizing information on knee joint ligament  
139 injuries will lead to novel suggestions for rehabilitation and prevention programs.

140

## 141 **Conclusion**

142 The present study identifies an increased incidence of CL surgery in Japan, along with gender and age  
143 characteristics. This trend is not limited to younger age groups but is also observed in middle-aged  
144 and older age groups. In the future, more detailed data should be extracted from medical databases to  
145 identify insights for optimal treatment strategies for specific populations.

146

## 147 **Acknowledgments**

148 This work was supported by JSPS KAKENHI Grant Numbers JP21K02905. We would like to express  
149 our gratitude to all the members of Taguri's laboratory for their valuable discussions and comments.  
150 Additionally, we would like to thank Editage (<https://www.editage.jp/>) for providing English language  
151 editing services.

152

153

## 154 **References**

- 155 1. Gianotti SM, Marshall SW, Hume PA, Bunt L. Incidence of anterior cruciate ligament injury  
156 and other knee ligament injuries: A national population-based study. *Journal of Science and*  
157 *Medicine in Sport*. 2009;12: 622–627. doi:10.1016/j.jsams.2008.07.005
- 158 2. Nordenvall R, Bahmanyar S, Adami J, Stenros C, Wredmark T, Felländer-Tsai L. A  
159 Population-Based Nationwide Study of Cruciate Ligament Injury in Sweden, 2001-2009:  
160 Incidence, Treatment, and Sex Differences. *Am J Sports Med*. 2012;40: 1808–1813.  
161 doi:10.1177/0363546512449306
- 162 3. Longo UG, Nagai K, Salvatore G, Cella E, Candela V, Cappelli F, et al. Epidemiology of  
163 Anterior Cruciate Ligament Reconstruction Surgery in Italy: A 15-Year Nationwide Registry  
164 Study. *JCM*. 2021;10: 223. doi:10.3390/jcm10020223
- 165 4. Lyman S, Koulouvaris P, Sherman S, Do H, Mandl LA, Marx RG. Epidemiology of Anterior  
166 Cruciate Ligament Reconstruction: Trends, Readmissions, and Subsequent Knee Surgery. *The*  
167 *Journal of Bone and Joint Surgery-American Volume*. 2009;91: 2321–2328.  
168 doi:10.2106/JBJS.H.00539
- 169 5. Janssen KW, Orchard JW, Driscoll TR, van Mechelen W. High incidence and costs for  
170 anterior cruciate ligament reconstructions performed in Australia from 2003-2004 to 2007-

- 171            2008: time for an anterior cruciate ligament register by Scandinavian model?: Incidence of  
172            ACL surgery in Australia. *Scand J Med Sci Sports*. 2012;22: 495–501. doi:10.1111/j.1600-  
173            0838.2010.01253.x
- 174    6.    Granan L-P, Forssblad M, Lind M, Engebretsen L. The Scandinavian ACL registries 2004–  
175            2007: baseline epidemiology. *Acta Orthopaedica*. 2009;80: 563–567.  
176            doi:10.3109/17453670903350107
- 177    7.    Longo UG, Viganò M, Candela V, de Girolamo L, Cella E, Thiebat G, et al. Epidemiology of  
178            Posterior Cruciate Ligament Reconstructions in Italy: A 15-Year Study. *JCM*. 2021;10: 499.  
179            doi:10.3390/jcm10030499
- 180    8.    Chung KS, Kim JH, Kong DH, Park I, Kim JG, Ha JK. An Increasing Trend in the Number of  
181            Anterior Cruciate Ligament Reconstruction in Korea: A Nationwide Epidemiologic Study.  
182            *Clin Orthop Surg*. 2022;14: 220. doi:10.4055/cios20276
- 183    9.    Chung KS. An increasing trend of posterior cruciate ligament reconstruction in South Korea:  
184            epidemiologic analysis using Korean National Health Insurance System Database. *Knee Surg*  
185            & *Relat Res*. 2021;33: 44. doi:10.1186/s43019-021-00126-y
- 186    10.    Takahashi S, Okuwaki T. Epidemiological survey of anterior cruciate ligament injury in

- 187 Japanese junior high school and high school athletes: cross-sectional study. *Research in Sports*
- 188 *Medicine*. 2017;25: 266–276. doi:10.1080/15438627.2017.1314290
- 189 11. Katano H, Ozeki N, Kohno Y, Nakagawa Y, Koga H, Watanabe T, et al. Trends in
- 190 arthroplasty in Japan by a complete survey, 2014–2017. *Journal of Orthopaedic Science*.
- 191 2021;26: 812–822. doi:10.1016/j.jos.2020.07.022
- 192 12. Katano H, Koga H, Ozeki N, Otabe K, Mizuno M, Tomita M, et al. Trends in isolated
- 193 meniscus repair and meniscectomy in Japan, 2011–2016. *Journal of Orthopaedic Science*.
- 194 2018;23: 676–681. doi:10.1016/j.jos.2018.04.003
- 195 13. Yamaguchi S, Kimura S, Akagi R, Yoshimura K, Kawasaki Y, Shiko Y, et al. Increase in
- 196 Achilles Tendon Rupture Surgery in Japan: Results From a Nationwide Health Care Database.
- 197 *Orthopaedic Journal of Sports Medicine*. 2021;9: 232596712110341.
- 198 doi:10.1177/23259671211034128
- 199 14. Ministry of Health, Labour and Welfare. 1st NDB open data Japan. 2014. Available:
- 200 <https://www.mhlw.go.jp/stf/seisakunitsuite/bunya/0000139390.html>
- 201 15. Ministry of Health, Labour and Welfare. 2nd NDB open data Japan. 2015. Available:
- 202 <https://www.mhlw.go.jp/stf/seisakunitsuite/bunya/0000177221.html>

- 203 16. Ministry of Health, Labour and Welfare. 3rd NDB open data Japan. 2016. Available:  
204 [https://www.mhlw.go.jp/stf/seisakunitsuite/bunya/0000177221\\_00002.html](https://www.mhlw.go.jp/stf/seisakunitsuite/bunya/0000177221_00002.html)
- 205 17. Ministry of Health, Labour and Welfare. 4th NDB open data Japan. 2017. Available:  
206 [https://www.mhlw.go.jp/stf/seisakunitsuite/bunya/0000177221\\_00003.html](https://www.mhlw.go.jp/stf/seisakunitsuite/bunya/0000177221_00003.html)
- 207 18. Ministry of Health, Labour and Welfare. 5th NDB open data Japan. 2018. Available:  
208 [https://www.mhlw.go.jp/stf/seisakunitsuite/bunya/0000177221\\_00008.html](https://www.mhlw.go.jp/stf/seisakunitsuite/bunya/0000177221_00008.html)
- 209 19. Ministry of Health, Labour and Welfare. 6th NDB open data Japan. 2019. Available:  
210 [https://www.mhlw.go.jp/stf/seisakunitsuite/bunya/0000177221\\_00010.html](https://www.mhlw.go.jp/stf/seisakunitsuite/bunya/0000177221_00010.html)
- 211 20. Japanese population. Statistics Bureau of the Ministry of Internal Affairs and Communications  
212 Website. [cited 9 Mar 2023]. Available: <https://www.stat.go.jp/data/jinsui/2.html>
- 213 21. Mahapatra P, Horriat S, Anand BS. Anterior cruciate ligament repair – past, present and  
214 future. *J EXP ORTOP*. 2018;5: 20. doi:10.1186/s40634-018-0136-6
- 215 22. Hopper GP, Heusdens CHW, Dossche L, Mackay GM. Posterior Cruciate Ligament Repair  
216 With Suture Tape Augmentation. *Arthroscopy Techniques*. 2019;8: e7–e10.  
217 doi:10.1016/j.eats.2018.08.022
- 218 23. Davarinos N, O'Neill BJ, Curtin W. A Brief History of Anterior Cruciate Ligament



- 219 Reconstruction. *Advances in Orthopedic Surgery*. 2014;2014: 1–6. doi:10.1155/2014/706042
- 220 24. Zheng W, Suzuki K, Yokomichi H, Sato M, Yamagata Z. Multilevel Longitudinal Analysis of  
221 Sex Differences in Height Gain and Growth Rate Changes in Japanese School-Aged Children.  
222 *Journal of Epidemiology*. 2013;23: 275–279. doi:10.2188/jea.JE20120164
- 223 25. Chotel F, Henry J, Seil R, Chouteau J, Moyen B, Bérard J. Growth disturbances without  
224 growth arrest after ACL reconstruction in children. *Knee Surg Sports Traumatol Arthrosc*.  
225 2010;18: 1496–1500. doi:10.1007/s00167-010-1069-5
- 226 26. Gicquel P, Geffroy L, Robert H, Sanchez M, Curado J, Chotel F, et al. MRI assessment of  
227 growth disturbances after ACL reconstruction in children with open growth plates–Prospective  
228 multicenter study of 100 patients. *Orthopaedics & Traumatology: Surgery & Research*.  
229 2018;104: S175–S181. doi:10.1016/j.otsr.2018.09.002
- 230 27. Weng C-J, Yeh W-L, Hsu K-Y, Chiu C, Chang S-S, Chen AC-Y, et al. Clinical and Functional  
231 Outcomes of Anterior Cruciate Ligament Reconstruction With Autologous Hamstring Tendon  
232 in Patients Aged 50 Years or Older. *Arthroscopy: The Journal of Arthroscopic & Related  
233 Surgery*. 2020;36: 558–562. doi:10.1016/j.arthro.2019.08.047
- 234 28. Filbay SR, Culvenor AG, Ackerman IN, Russell TG, Crossley KM. Quality of life in anterior

- 235           cruciate ligament-deficient individuals: a systematic review and meta-analysis. Br J Sports  
236           Med. 2015;49: 1033–1041. doi:10.1136/bjsports-2015-094864
- 237    29.   van Meer BL, Meuffels DE, van Eijsden WA, Verhaar JAN, Bierma-Zeinstra SMA, Reijman  
238           M. Which determinants predict tibiofemoral and patellofemoral osteoarthritis after anterior  
239           cruciate ligament injury? A systematic review. Br J Sports Med. 2015;49: 975–983.  
240           doi:10.1136/bjsports-2013-093258
- 241    30.   Toanen C, Demey G, Ntagiopoulos PG, Ferrua P, Dejour D. Is There Any Benefit in Anterior  
242           Cruciate Ligament Reconstruction in Patients Older Than 60 Years? Am J Sports Med.  
243           2017;45: 832–837. doi:10.1177/0363546516678723
- 244    31.   Liu C-H, Chiu C-H, Chang S-S, Yeh W-L, Chen AC-Y, Hsu K-Y, et al. Clinical and  
245           functional outcomes of isolated posterior cruciate ligament reconstruction in patients over the  
246           age of 40 years. BMC Musculoskelet Disord. 2022;23: 210. doi:10.1186/s12891-022-05151-w
- 247
- 248

## 249 **Supporting information**

250 S1 Table. STROBE Statement—checklist of items that should be included in reports of observational  
251 studies.

252 S2 Table. Annual registrations of arthroscopic ligament reconstruction according to age groups from  
253 2014 to 2019. To avoid the identification of individuals, aggregate units that are <10 in principle are  
254 not included.

255 S3 Table. Annual registrations of arthroscopic ligament reconstruction per 100,000 population  
256 according to sex and age groups from 2014 to 2019. To avoid the identification of individuals,  
257 aggregate units that are <10 in principle are not included.

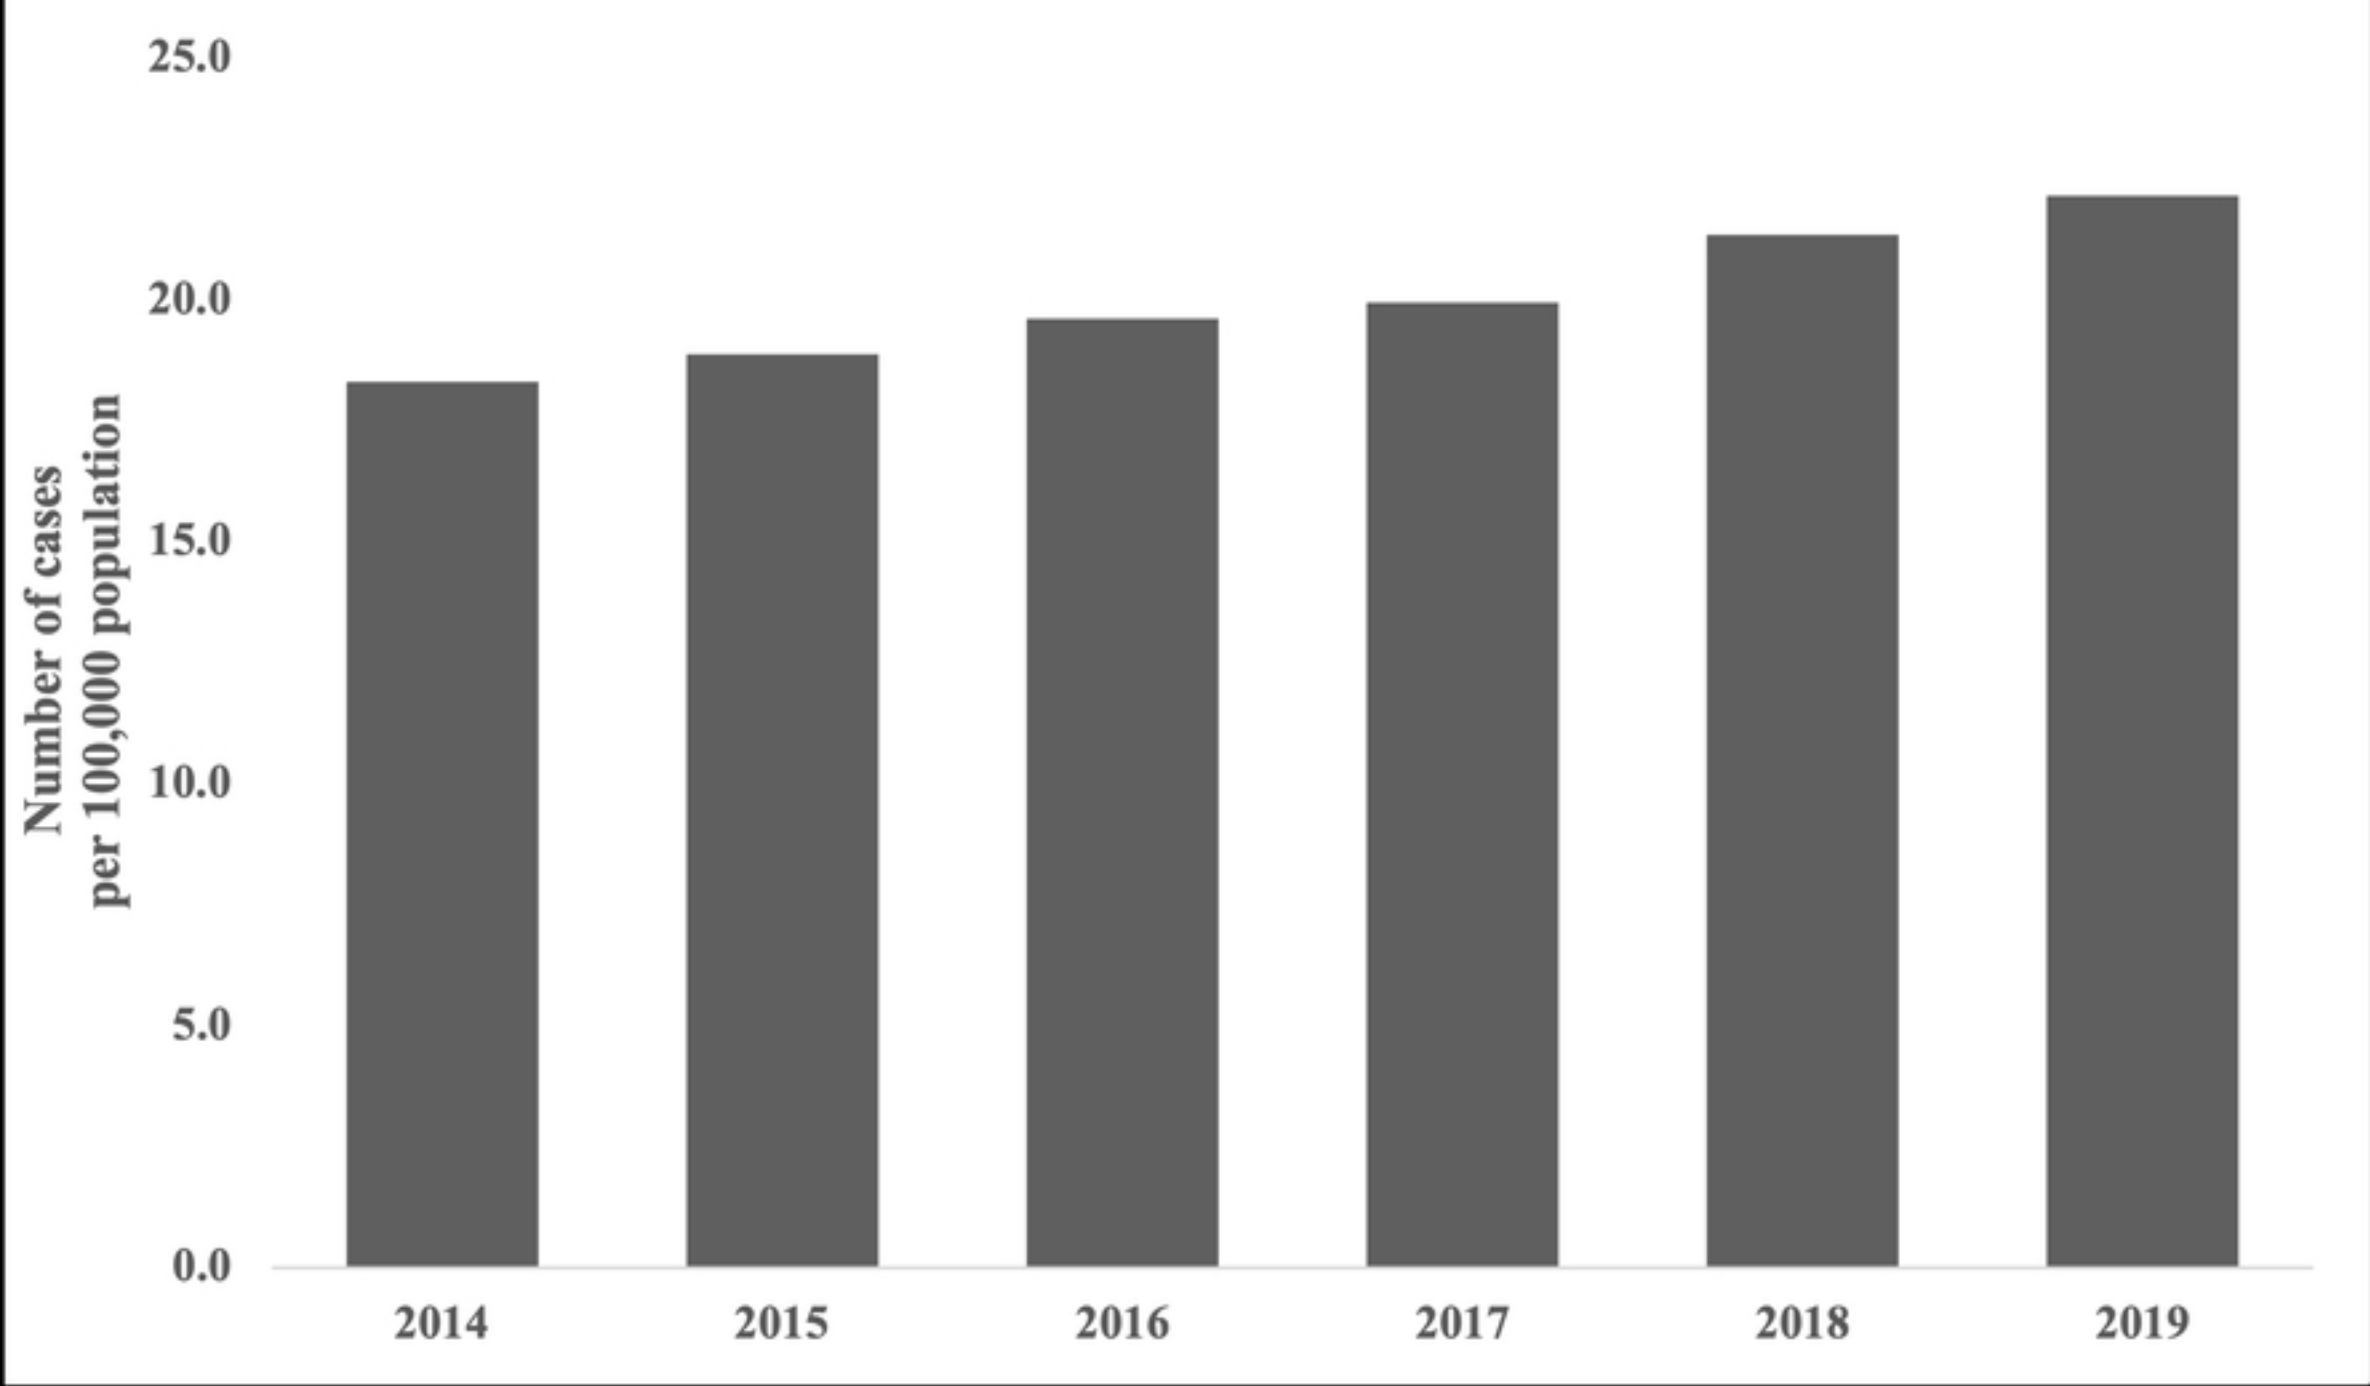

Figure1

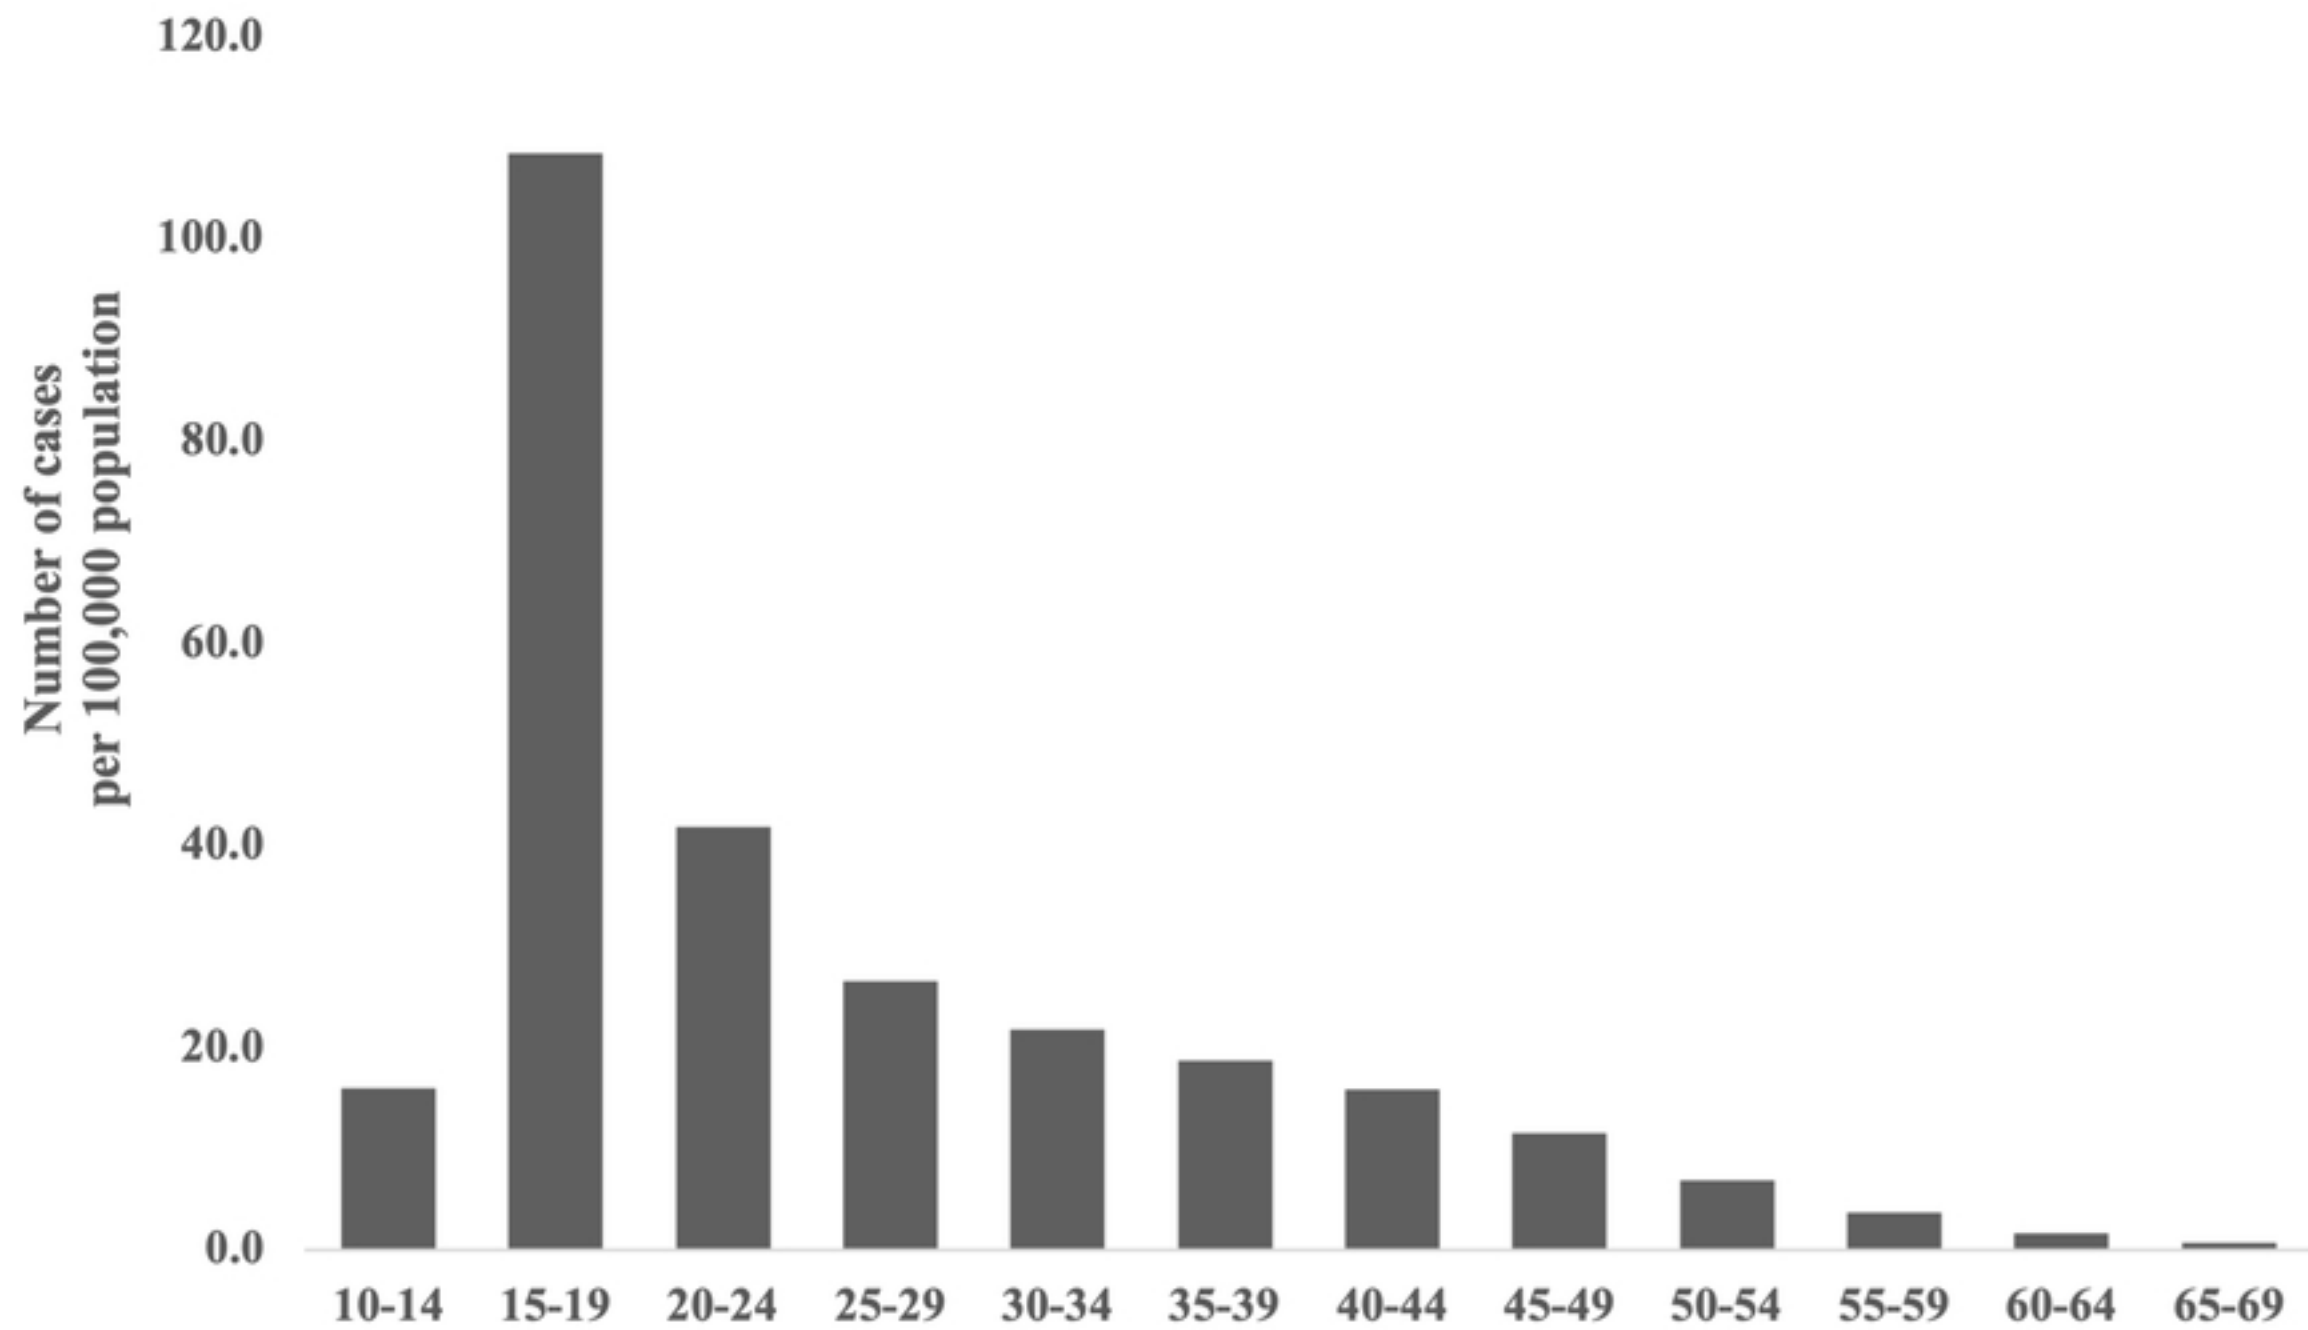

Figure2

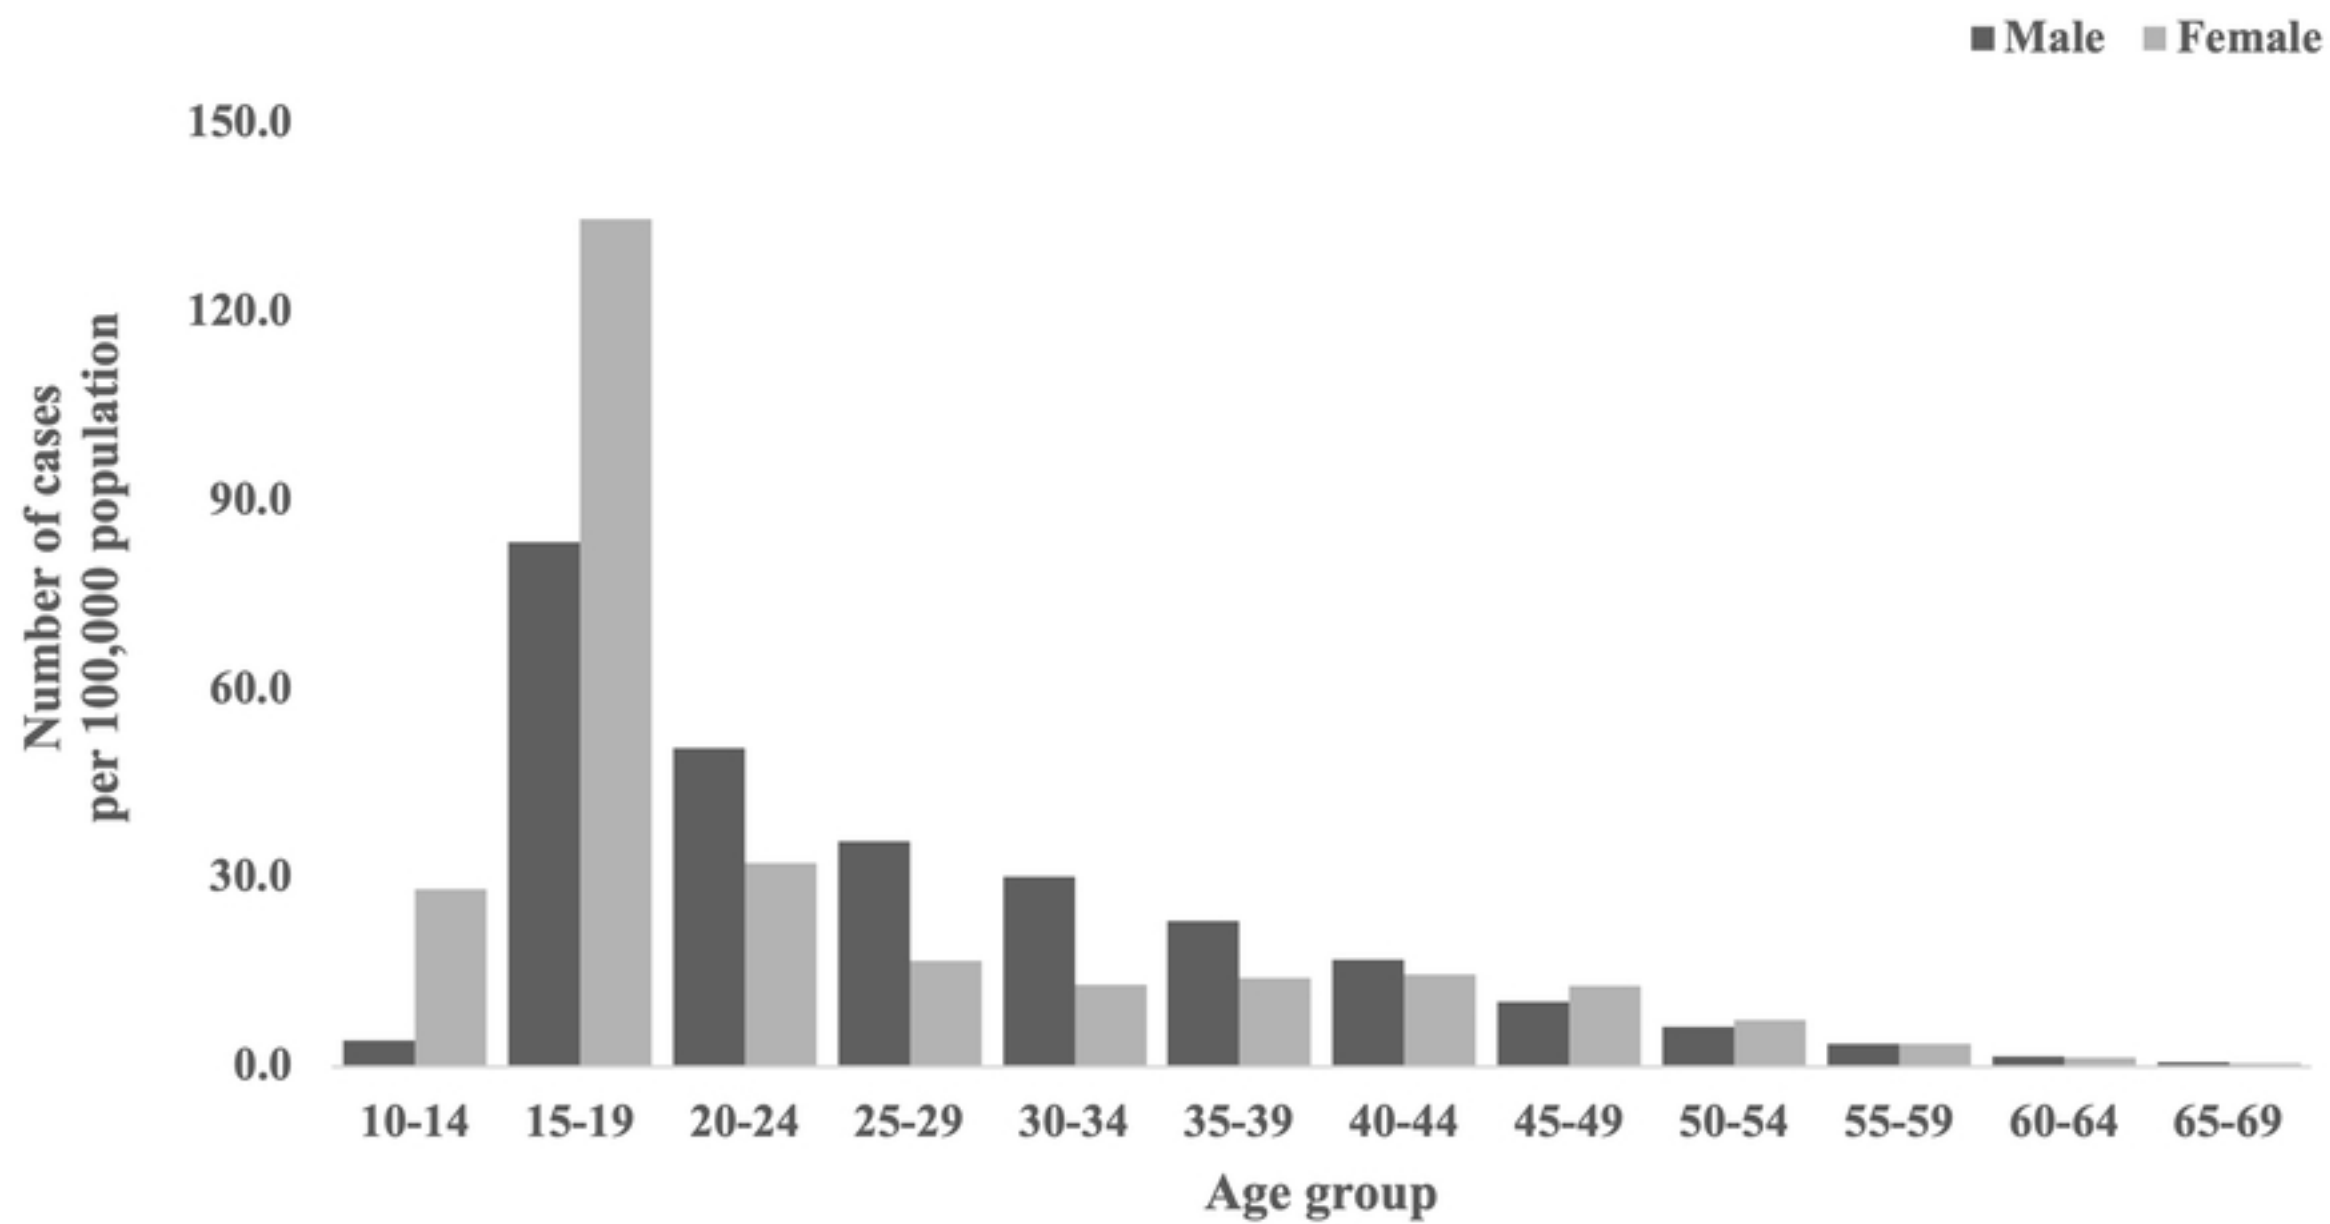

Figure3
